# Supplementary material
Source: PubMed Central journal article supplement (PMC6154236)

---

**This research survey focuses on the CGM in the Cloud Facebook group and the Nightscout system. Please fill out this survey even if you do not use Nightscout.**

This survey is for **adults**. If you are a minor (<18 years) please have your parent fill this out for your family.

We are collecting information about **households**, so if there are two individuals in your household in the Facebook group, **please have just one person fill out the survey.**

**Definitions:**

A **household** consists of one or more people who live in the same dwelling and also share meals or living accommodation, and may consist of a single family or some other grouping of people.

**CGM in the Cloud** is the Facebook group that was created for the purpose of sharing information about the Nightscout System with an online community.

The **Nightscout system** allows you to attach a device to the Dexcom receiver that transmits the glucose readings to the internet, where any web-connected device can view the numbers. For more information see: <http://www.nightscout.info/>

This survey was created with CGM in the Cloud community members and colleagues from the University of Michigan. If you have questions or concerns please contact Dr. Joyce Lee at: [joycee@umich.edu](mailto:joycee@umich.edu). This study was approved by the University of Michigan IRB: HUM00099772.

---

Please tell us your relationship with Diabetes.

I am: (Select all that apply)

- Someone who works in the area of Diabetes
- An individual with Diabetes
- The caregiver/parent/guardian of an individual with Diabetes
- A spouse/significant other of an individual with Diabetes
- A relative of an individual with Diabetes
- A friend of an individual with Diabetes
- None of the Above
- Other (specify): \_\_\_\_\_

---

*Display This Question:*

*If Please tell us your relationship with Diabetes. I am: (Select all that apply) = Someone who works in the area of Diabetes*

If you work in the area of diabetes, please indicate what your role is: (Select all that apply)

- Dietitian
  - Researcher
  - Physician
  - Nurse Practitioner (NP)
  - Registered Nurse (RN)
  - Certified Diabetes Educator (CDE)
  - Insurance Company Employee
  - Diabetes Pharmaceutical Company Employee
  - Diabetes Device Company Employee
  - Diabetes Funding Organization Employee
  - Diabetes Nonprofit Employee
  - Diabetes Research Organization Employee
  - Diabetes Social Media (Blogger, etc)
  - Other (specify): \_\_\_\_\_
- 

Are you a member of the CGM in the Cloud Facebook group?

***CGM in the Cloud*** is the Facebook group that was created for the purpose of sharing information about the Nightscout System with an online community.

- Yes
- No

---

How did you first hear about the CGM in the Cloud Facebook group?

- Friend
- Family
- Social media via Facebook
- Social media via Twitter
- Social media via Blogpost
- Traditional Media (article in the newspaper, or news on TV or the radio)
- Healthcare provider
- Other (specify): \_\_\_\_\_

---

How did you **first** hear about the Nightscout Project? The **Nightscout system** allows you to attach a device to the Dexcom receiver that transmits the glucose readings to the internet,

where any web-connected device can view the numbers. For more information see: <http://www.nightscout.info/>

- Friend
- Family
- Social Media via the CGM in the Cloud Facebook group
- Social media via Facebook (Facebook group or connections other than the CGM in the Cloud group)
- Social media via Twitter
- Social media via Blogpost
- Traditional Media (article in the newspaper, or news on TV or the radio)
- Healthcare provider
- Other (specify): \_\_\_\_\_

End of Block: Who are you/How Did You Hear About NS/CGM in the Cloud

---

Start of Block: CGM in the cloud member engagement

*Display This Question:*

*If Are you a member of the CGM in the Cloud Facebook group? CGM in the Cloud is the Facebook g... = Yes*

In the past week, on average, how many minutes **per day** have you spent on the CGM in the Cloud Facebook group?

- 0 minutes
- Less than 10 minutes
- 10 to 29 minutes
- 30 to 59 minutes
- 1 to less than 2 hours
- 2 to less than 3 hours
- 3 hours or more

---

*Display This Question:*

*If Are you a member of the CGM in the Cloud Facebook group? CGM in the Cloud is the Facebook g... = Yes*

How likely are you to use the CGM in the Cloud Facebook group to...

|                                                                      | Not at all likely     | A little likely       | Somewhat likely       | Very likely           | Extremely likely      |
|----------------------------------------------------------------------|-----------------------|-----------------------|-----------------------|-----------------------|-----------------------|
| Learn more about the latest technology in diabetes                   | <input type="radio"/> |
| Learn more about diabetes in general                                 | <input type="radio"/> |
| Learn more about Nightscout                                          | <input type="radio"/> |
| Share information about diabetes and/or diabetes technology          | <input type="radio"/> |
| Give technical assistance to other individuals using Nightscout      | <input type="radio"/> |
| Receive technical assistance from other individuals using Nightscout | <input type="radio"/> |
| Give emotional support for diabetes                                  | <input type="radio"/> |
| Receive emotional support for diabetes                               | <input type="radio"/> |

Have you met anyone from the CGM in the Cloud community in person that you hadn't met before, because of a connection through the Facebook group?

- Yes
  - No
  - I don't know
- 

Have you or someone in your household been **helped** by following medical advice or health information found on the CGM in the Cloud Facebook Group?

- Yes, please describe \_\_\_\_\_
  - No
  - I don't know
- 

Have you or someone in your household been **harmed** by following medical advice or health information found on the CGM in the Cloud Facebook Group?

- Yes, please describe \_\_\_\_\_
- No
- I don't know

End of Block: CGM in the cloud member engagement

---

Start of Block: Paying it forward (HOUSEHOLD)



Have you helped others in the CGM in the Cloud community by "paying it forward" (i.e. provide diabetes-related help/assistance to someone else in the community)?

- I have helped others
- I have NOT helped others
- I don't know

---

*Display This Question:*

*If Have you helped others in the CGM in the Cloud community by "paying it forward" (i.e. provide dia... = I have helped others*

If so, please describe the activities that you/your household have contributed (check all that apply).

- Writing computer code
- Answering questions on the CGM in the Cloud Facebook group
- Answering questions in person
- Writing documentation
- Creating diagrams/figures
- Creating memes
- Expanding Nightscout to other countries
- Forming local Nightscout groups
- Other (specify): \_\_\_\_\_

---

*Display This Question:*

*If If so, please describe the activities that you/your household have contributed (check all that ap...  
q://QID314/SelectedChoicesCount Is Greater Than or Equal to 1*

Can you tell us more about what you have contributed? If you are willing, please share links.

---

---

---

---

---

---

*Display This Question:*

*If If so, please describe the activities that you/your household have contributed (check all that ap...  
q://QID314/SelectedChoicesCount Is Greater Than or Equal to 1*

If you have any additional resources you would like to share with us, please upload the file here.

End of Block: Paying it forward (HOUSEHOLD)

---

Start of Block: Trust Questions

In general, please select which group is more helpful when you need certain types of information or support about health: health professionals like doctors and nurses, fellow patients, friends, and family, or both equally

|                                                               | Professional sources<br>like doctors and<br>nurses | Fellow patients,<br>friends, and family | Both equally          |
|---------------------------------------------------------------|----------------------------------------------------|-----------------------------------------|-----------------------|
| Information about prescription drugs                          | <input type="radio"/>                              | <input type="radio"/>                   | <input type="radio"/> |
| Information about alternative treatments                      | <input type="radio"/>                              | <input type="radio"/>                   | <input type="radio"/> |
| A recommendation for a doctor or specialist                   | <input type="radio"/>                              | <input type="radio"/>                   | <input type="radio"/> |
| A recommendation for a hospital or other medical facility     | <input type="radio"/>                              | <input type="radio"/>                   | <input type="radio"/> |
| Emotional support in dealing with a health issue              | <input type="radio"/>                              | <input type="radio"/>                   | <input type="radio"/> |
| A quick remedy for an everyday health issue                   | <input type="radio"/>                              | <input type="radio"/>                   | <input type="radio"/> |
| Practical advice for coping with day-to-day health situations | <input type="radio"/>                              | <input type="radio"/>                   | <input type="radio"/> |

End of Block: Trust Questions

Start of Block: Prying/Empower

As a member of the CGM in the Cloud Facebook Group, regardless of whether you currently use Nightscout or not, we wanted to ask you a few questions about your perceptions of the Nightscout technology. The **Nightscout system** allows you to attach a device to the Dexcom receiver that transmits the glucose readings to the internet, where any web-connected device can view the numbers. For more information see: <http://www.nightscout.info/>  
Please describe how you feel about the Nightscout technology.

How prying do you think Nightscout technology is?

- Not at all prying
  - A little prying
  - Somewhat prying
  - Very prying
  - Extremely prying
- 

How empowering do you think Nightscout technology is?

- Not at all empowering
- A little empowering
- Somewhat empowering
- Very empowering
- Extremely empowering

End of Block: Prying/Empower

---

Start of Block: Diabetes/Demo questions MYSELF

Now we would like to ask you more questions regarding **you** and **your diabetes care.**  
How would you describe your overall health?

- Excellent
  - Very Good
  - Good
  - Fair
  - Poor
- 

What type of diabetes do you have?

- Type 1 Diabetes
  - Type 2 Diabetes
  - Other type of Diabetes (specify):  
\_\_\_\_\_
  - I don't know
- 

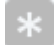

How old were you when you were **diagnosed** with diabetes (please enter in number of years)?

*(Enter 9999 if you do not know)*

---

How do you usually take insulin? (Check all that apply)

- Pump
- Injections/Pens
- I do not take insulin

---

*Display This Question:*

*If How do you usually take insulin? (Check all that apply) = Pump*

If you are on an insulin pump, which type are you currently using?

- Medtronic Minimed
- Animas One Touch Ping
- Insulet Omnipod
- Tandem T: Slim
- Roche Insulin Delivery System
- Sooil Dana Diabecare
- Asante Snap
- Other (specify): \_\_\_\_\_

---

A **continuous glucose monitor** is often referred to as CGM. It consists of a sensor that is inserted underneath the skin and a monitor that shows your glucose values every 5 to 10 minutes.

Which of the following best describes your use of a real-time continuous glucose monitor (CGM) as described above?

- I currently use a real-time CGM (occasionally or at all the time)
- I used a real-time CGM in the past but have completely stopped using it
- I never used a real-time CGM
- I don't know

*Skip To: End of Block If A continuous glucose monitor is often referred to as CGM. It consists of a sensor that is inser... = I never used a real-time CGM*

*Display This Question:*

*If A continuous glucose monitor is often referred to as CGM. It consists of a sensor that is inser... = I currently use a real-time CGM (occasionally or at all the time)*

Which continuous glucose monitoring (CGM) device do you **currently** use?

- Enlite
- Paradigm
- Guardian
- Navigator
- Dexcom G4
- Other (specify): \_\_\_\_\_

*Display This Question:*

*If A continuous glucose monitor is often referred to as CGM. It consists of a sensor that is inser... = I currently use a real-time CGM (occasionally or at all the time)*

How long have you been using CGM?

- Less than 6 months
- 6 months to less than 1 year
- 1 year to less than 2 years
- 2 years to less than 3 years
- 3 years to less than 4 years
- 4 years to less than 5 years
- 5 or more years

---

*Display This Question:*

*If A continuous glucose monitor is often referred to as CGM. It consists of a sensor that is inser... = I currently use a real-time CGM (occasionally or at all the time)*

In the past month, about **how many days** have you used the CGM?

▼ I don't know ... 31

---

In the past 3 months, about how many times have you experienced severe low blood sugar (hypoglycemia) that resulted in passing out, loss of consciousness, or seizure:

*\*\*Note: This survey is anonymous and an individual's reported data will not be shared to anyone outside of the research team\*\**

▼ 0 ... I don't know

---

*Display This Question:*

*If A continuous glucose monitor is often referred to as CGM. It consists of a sensor that is inser... != I never used a real-time CGM*



Which of the following best describes your use of Nightscout?

- I currently use Nightscout (occasionally or all the time)
- I used Nightscout in the past but have completely stopped using it
- I never used Nightscout

End of Block: Diabetes/Demo questions MYSELF

---

Start of Block: NS/CGM Activities (MYSELF)

If yes, what month and year did you start using Nightscout?

|                                        | Month                  | Year            |
|----------------------------------------|------------------------|-----------------|
| Please enter the value for month, year | ▼ January ... December | ▼ 2012 ... 2015 |

---

In the past month, about **how many days** have you used Nightscout?

▼ I don't know ... 31

---

Did you do any of the following because of Nightscout? (Check all that apply)

- I had not previously used a CGM but started using CGM because of Nightscout
  - I had previously used a CGM and restarted using CGM because of Nightscout
  - I was using CGM but changed CGM systems because of Nightscout
  - None of the above
  - Other \_\_\_\_\_
-

Display This Question:

*If Did you do any of the following because of Nightscout? (Check all that apply) = I was using CGM but changed CGM systems because of Nightscout*

Which CGM device did you use before starting Nightscout?

- Enlite
  - Paradigm
  - Guardian
  - Navigator
  - I don't know
- 

What activities do you use Nightscout for? (Check all that apply)

- Travel
  - Nighttime
  - Work
  - Sporting Events
  - School
  - Other (specify): \_\_\_\_\_
  - I don't know
-

Does your Endocrinologist know that you use Nightscout?

- Yes
- No
- I don't know

---

*Display This Question:*

*If Does your Endocrinologist know that you use Nightscout? = Yes*

Is your Endocrinologist supportive of your use of Nightscout?

- Yes
- No
- I don't know

End of Block: NS/CGM Activities (MYSELF)

---

Start of Block: Nightscout Questions (MYSELF)

**We are interested to see how you are using the Nightscout Technology. We will now be asking you a handful of questions regarding your current use of Nightscout.**

Which version of Nightscout do you currently use?

- Apple Pie (Original/1st release)
  - Brownie
  - Cookie Monster
  - Dreamsicle
  - Enchilada
  - I don't know
-

We want to learn more about who is viewing Nightscout data and the types of technologies they use to view the data. **Please check the boxes to indicate who is viewing Nightscout data and what types of technology they are using to view your blood sugars.**

*Here is a hypothetical example of how to fill out the table below: if you are wearing the Nightscout technology and you also use a pebble watch to monitor your Nightscout data along with a web-based browser, Care Portal, and push notifications AND you also have a close friend using a pebble watch to view your data, and your wife uses a pebble watch and also uses a mobile application to view your Nightscout data while receiving both push notifications and text notifications....*

*Then, in the example above, the table would be filled out as follows:*

**Definitions:** *Pebble watch: Some individuals are using a pebble watch to display the glucose data* *Android Wear: A watch specifically used for Android phones to display glucose data*  
*Mobile Applications: Some individuals are viewing readings on an Android phone or iPhone* *Web-based Browser: The traditional desktop display is used for viewing blood glucose values from a laptop or desktop* *Care Portal: A care portal has a place to enter data about insulin and carbohydrates as well as the display of the blood glucose values* *Push Notifications: Alarms that are sent to the user to let them know about changes (arrows, low and high blood sugars)* *Text Notifications: Alarms that are sent to the user via SMS messaging to let user/caregiver know about changes (arrows, low and high blood sugars)*

**Please check the boxes to indicate who is viewing your Nightscout data and what types of technology they are using to view your blood sugars.**



|                                     | Pebble Watch             | Android Wear             | Mobile applications (Android or iPhone) | Web-based browser (for laptop or desktop) | Care Portal              | Push notifications       | Text notifications       |
|-------------------------------------|--------------------------|--------------------------|-----------------------------------------|-------------------------------------------|--------------------------|--------------------------|--------------------------|
| Myself (tools you use for yourself) | <input type="checkbox"/> | <input type="checkbox"/> | <input type="checkbox"/>                | <input type="checkbox"/>                  | <input type="checkbox"/> | <input type="checkbox"/> | <input type="checkbox"/> |
| Your first son                      | <input type="checkbox"/> | <input type="checkbox"/> | <input type="checkbox"/>                | <input type="checkbox"/>                  | <input type="checkbox"/> | <input type="checkbox"/> | <input type="checkbox"/> |
| Your second son                     | <input type="checkbox"/> | <input type="checkbox"/> | <input type="checkbox"/>                | <input type="checkbox"/>                  | <input type="checkbox"/> | <input type="checkbox"/> | <input type="checkbox"/> |
| Your third son                      | <input type="checkbox"/> | <input type="checkbox"/> | <input type="checkbox"/>                | <input type="checkbox"/>                  | <input type="checkbox"/> | <input type="checkbox"/> | <input type="checkbox"/> |
| Your first daughter                 | <input type="checkbox"/> | <input type="checkbox"/> | <input type="checkbox"/>                | <input type="checkbox"/>                  | <input type="checkbox"/> | <input type="checkbox"/> | <input type="checkbox"/> |
| Your second daughter                | <input type="checkbox"/> | <input type="checkbox"/> | <input type="checkbox"/>                | <input type="checkbox"/>                  | <input type="checkbox"/> | <input type="checkbox"/> | <input type="checkbox"/> |
| Your third daughter                 | <input type="checkbox"/> | <input type="checkbox"/> | <input type="checkbox"/>                | <input type="checkbox"/>                  | <input type="checkbox"/> | <input type="checkbox"/> | <input type="checkbox"/> |
| Your mom                            | <input type="checkbox"/> | <input type="checkbox"/> | <input type="checkbox"/>                | <input type="checkbox"/>                  | <input type="checkbox"/> | <input type="checkbox"/> | <input type="checkbox"/> |
| Your stepmom                        | <input type="checkbox"/> | <input type="checkbox"/> | <input type="checkbox"/>                | <input type="checkbox"/>                  | <input type="checkbox"/> | <input type="checkbox"/> | <input type="checkbox"/> |
| Your dad                            | <input type="checkbox"/> | <input type="checkbox"/> | <input type="checkbox"/>                | <input type="checkbox"/>                  | <input type="checkbox"/> | <input type="checkbox"/> | <input type="checkbox"/> |
| Your stepdad                        | <input type="checkbox"/> | <input type="checkbox"/> | <input type="checkbox"/>                | <input type="checkbox"/>                  | <input type="checkbox"/> | <input type="checkbox"/> | <input type="checkbox"/> |
| Your brother                        | <input type="checkbox"/> | <input type="checkbox"/> | <input type="checkbox"/>                | <input type="checkbox"/>                  | <input type="checkbox"/> | <input type="checkbox"/> | <input type="checkbox"/> |
| Your sister                         | <input type="checkbox"/> | <input type="checkbox"/> | <input type="checkbox"/>                | <input type="checkbox"/>                  | <input type="checkbox"/> | <input type="checkbox"/> | <input type="checkbox"/> |

|                               |                          |                          |                          |                          |                          |                          |                          |
|-------------------------------|--------------------------|--------------------------|--------------------------|--------------------------|--------------------------|--------------------------|--------------------------|
| Your spouse/significant other | <input type="checkbox"/> |
| Your close friend             | <input type="checkbox"/> |
| Other (specify):              | <input type="checkbox"/> |
| Other (specify):              | <input type="checkbox"/> |

What features of Nightscout are you using for medical decision making? (Select all that apply)

**Definition:** Raw data: for more information click here IOB/COB: for more information click here Predictive data: data that will tell you if glucose levels are going the wrong direction too quickly or if the user may be in trouble soon. Customized alarms: customized alarms set on certain high and low targets Signal Noise: defines how clean the signal being received is; helps to identify compression lows Camping Mode: allows for Nightscout to continue to work when there is no internet access available

- Raw Data
- Insulin on Board (IOB); Carbs on Board (COB)
- Predictive Data
- Customized Alarms
- Signal Noise
- Camping Mode
- Other (specify): \_\_\_\_\_
- None of the above

Display This Question:

If What features of Nightscout are you using for medical decision making? (Select all that apply) ... = Customized Alarms

**If you use customized alarms, what are your targets?**

Typically the practice in the United States is to measure blood glucose levels using mg/dL (normal range 70-120 mg/dL.) Outside of the U.S. the measure of blood glucose levels is often reported using mmol/L(normal range is 3.9-6.7 mmol/L).

Please answer the following questions by entering a numeric value and select the appropriate units that correspond to the numbers entered.

|             | Blood Glucose Numeric Value | Units              |
|-------------|-----------------------------|--------------------|
|             |                             |                    |
| High target |                             | ▼ mmol/L ... mg/dl |
| Low target  |                             | ▼ mmol/L ... mg/dl |

There are many different features of Nightscout that may be used for medical decision making beyond the real-time number. Please indicate which of the labeled features are currently being used.

Below are the Desktop, Mobile, and Pebble display. Please note the corresponding features labeled as "A" and "B."



- I use feature "A" on the above image - the small yellow **number**
- I use feature "B" on the above image - the small yellow **arrow**
- I use **both** feature "A" and feature "B"
- I do **not** use either feature "A" and feature "B"

Please answer the following questions about your diabetes before and after using Nightscout:

|                                                                          | Before Nightscout        | After Nightscout         |
|--------------------------------------------------------------------------|--------------------------|--------------------------|
| How often has diabetes kept you from doing your normal daily activities? | ▼ Never ... I don't know | ▼ Never ... I don't know |
| How often has diabetes kept you from spending time at work?              | ▼ Never ... I don't know | ▼ Never ... I don't know |
| How often has diabetes kept you from spending time with friends?         | ▼ Never ... I don't know | ▼ Never ... I don't know |

On average, how many times **per day** did you check your blood sugar with a blood glucose meter before and after using Nightscout?

|               | Before Nightscout    | After Nightscout     |
|---------------|----------------------|----------------------|
| Times per day | ▼ 0 ... I don't know | ▼ 0 ... I don't know |

On average, how many short-acting insulin boluses **per day** (*bolus doses of insulin for meals, snacks, and high blood sugars*) did you give before and after Nightscout?

|                 | Before Nightscout    | After Nightscout     |
|-----------------|----------------------|----------------------|
| Boluses per day | ▼ 0 ... I don't know | ▼ 0 ... I don't know |

On average, how many short-acting insulin boluses **per day** (*bolus doses of insulin for meals, snacks, and high blood sugars*) did you give **without checking blood sugar** first with a blood glucose meter before and after using Nightscout?

|                                                                   | Before Nightscout    | After Nightscout     |
|-------------------------------------------------------------------|----------------------|----------------------|
| Boluses per day without checking with a blood glucose meter first | ▼ 0 ... I don't know | ▼ 0 ... I don't know |

On average, how often did you download retrospective (past) data from your CGM before and after Nightscout?

|                                                          | Before Nightscout        | After Nightscout         |
|----------------------------------------------------------|--------------------------|--------------------------|
| Download frequency of retrospective (past) data from CGM | ▼ Never ... I don't know | ▼ Never ... I don't know |

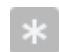

How many instances of low blood glucose OR **trending towards low blood glucose** have you responded to (make a change in insulin dosing, ingest carb, etc.) **IN THE PAST MONTH** while monitoring your blood sugars on Nightscout?

Please enter the # of instances. (Enter 9999 if you do not know, enter 0 if you have had no instances)

**Please answer this question if your medical professional reports your HbA1c using % as the unit (typically this is the practice in the United States). Otherwise, please skip to the next question.** Normally in the United States, HbA1c is expressed in a percentage (%) and a HbA1c of 7.0% correlates with an average blood glucose level of 154 mg/dL. What was your HbA1c value, including the month and year, shortly before and after starting Nightscout?

If you don't remember, leave blank.

|                   | Month of HbA1c             | Year of HbA1c   | HbA1c value (%)         |
|-------------------|----------------------------|-----------------|-------------------------|
| Before Nightscout | ▼ January ... I don't know | ▼ 2011 ... 2015 | ▼ 4.0% ... I don't know |
| After Nightscout  | ▼ January ... I don't know | ▼ 2011 ... 2015 | ▼ 4.0% ... I don't know |

**Please answer this question if your medical professional reports your HbA1c using mmol/mol as the unit (typically this is the practice outside of the United States). If you have answered the question above using % as your measure of HbA1c, please skip this question.** Normally outside the United States, HbA1c is expressed in mmol/mol and a HbA1c of 53.0 mmol/mol correlates with an average blood glucose level of 8.6 mmol/L. What was your HbA1c value, including the month and year, shortly before and after starting Nightscout?

If you don't remember, leave blank.

|                   | Month of HbA1c             | Year of HbA1c   | HbA1c value (mmol/mol)         |
|-------------------|----------------------------|-----------------|--------------------------------|
| Before Nightscout | ▼ January ... I don't know | ▼ 2011 ... 2015 | ▼ 20 mmol/mol ... I don't know |
| After Nightscout  | ▼ January ... I don't know | ▼ 2011 ... 2015 | ▼ 20 mmol/mol ... I don't know |

End of Block: Nightscout Questions (MYSELF)

---

Start of Block: Dexcom Share NS user (MYSELF)

Dexcom recently released its new Dexcom Share software which transfers information from the Dexcom receiver wirelessly to an iPhone so that other individuals can follow the blood sugars remotely.

<http://www.dexcom.com/dexcom-cgm-with-share>

**Have you switched or do you plan to switch to the Dexcom Share system?**

- I have switched/plan to switch to Dexcom Share
  - I will be staying with Nightscout
  - I plan to use both the Dexcom Share and Nightscout
  - I don't know
- 

*Display This Question:*

*If Dexcom recently released its new Dexcom Share software which transfers information from the Dex... = I have switched/plan to switch to Dexcom Share*

If you will be switching to Dexcom Share system, what is/are the reason(s) you made this choice? (Check all that apply)

- The Nightscout equipment is too expensive
  - The Nightscout equipment has a lot of technical failures
  - The Nightscout system requires a physical connection to a cord
  - The connection to the Android phone could break the Dexcom receiver
  - We use mostly Apple products (iphone, Macbook) in our household
  - Other (specify): \_\_\_\_\_
-

Display This Question:

If Dexcom recently released its new Dexcom Share software which transfers information from the Dex... = I will be staying with Nightscout

If you will be staying with Nightscout, what is/are the reason(s) you made this choice? (Check all that apply)

The Dexcom Share equipment is too expensive

I don't use Apple (iPhone, Macbook) products

Other (specify): \_\_\_\_\_

Display This Question:

If Dexcom recently released its new Dexcom Share software which transfers information from the Dex... = I plan to use both the Dexcom Share and Nightscout

How do you plan to use both the Dexcom Share and Nightscout together?

---

---

---

---

---

End of Block: Dexcom Share NS user (MYSELF)

Start of Block: Why stop NS

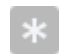

Why did you stop using Nightscout? (Please **drag** the reason from the "Items" list in the appropriate order to the box on the right.)

Reason (please rank top 3)

- 
- \_\_\_\_\_ The Nightscout equipment is too expensive
- \_\_\_\_\_ The CGM does not provide reliable readings
- \_\_\_\_\_ Insurance won't cover a continuous glucose monitoring system
- \_\_\_\_\_ We tried to install the Nightscout system but were unsuccessful

- \_\_\_\_\_ Maintaining the Nightscout system was too technically difficult
- \_\_\_\_\_ Nightscout system was too much work
- \_\_\_\_\_ I did not want to wear Nightscout
- \_\_\_\_\_ I am independent so does not need Nightscout
- \_\_\_\_\_ Other (specify):
- \_\_\_\_\_ I don't know

End of Block: Why stop NS

---

Start of Block: Dexcom Share - No NS (MYSELF)

Dexcom recently released its new Dexcom Share software which transfers information from the Dexcom receiver wirelessly to an iPhone so that other individuals can follow the blood sugars remotely. <http://www.dexcom.com/dexcom-cgm-with-share>

**Have you started using or do you plan to use the Dexcom Share system?**

- Yes
- No
- I don't know

---

*Display This Question:*

*If Dexcom recently released its new Dexcom Share software which transfers information from the Dexc... = Yes*

If you use or plan to use the Dexcom Share system, what are the reasons? (Check all that apply)

- The Dexcom Share is easier to set up than Nightscout
- We use Apple (iPhone, Macbook) products in our household
- Other (specify): \_\_\_\_\_
- I don't know

End of Block: Dexcom Share - No NS (MYSELF)

---

Start of Block: Why No NS (MYSELF)

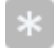

Why did you choose not to use Nightscout? (Please **drag** the reason from the "Items" list in the appropriate order to the box on the right.)

Reasons (please rank top 3)

- The Nightscout equipment is too expensive
- The CGM does not provide reliable readings
- Insurance won't cover a continuous glucose monitoring system
- We tried to install the Nightscout system but were unsuccessful
- Maintaining the Nightscout system was too technically difficult
- Nightscout system was too much work
- I did not want to wear Nightscout
- I am independent so does not need Nightscout
- Other (specify):
- I don't know

End of Block: Why No NS (MYSELF)

---

Start of Block: Health Status/Insurance (MYSELF)

How would you describe the insurance plan(s) you have had in the past 12 months? (Check all that apply)

- Private Health Insurance (e.g., commercial, fee-for-service, HMO, PPO, POS)
  - Medicare
  - MediGap
  - Medicaid
  - State Children's Health Insurance Program OR Children's Health Insurance Program
  - Military health care (e.g., TRICARE, CHAMPUS, CHAMPVA, VA)
  - Indian Health Service plan
  - Other state sponsored health plan
  - Other government sponsored health coverage plan
  - Single service plan (e.g., dental, vision, prescriptions)
  - No health insurance or health care coverage of any type
  - Do not wish to provide
  - I don't know
-



How much of a problem is the current cost of diabetes supplies and treatment for your household?

- Not a problem at all
- A little problem
- A moderate problem
- A big problem
- An enormous problem

End of Block: Health Status/Insurance (MYSELF)

---

Start of Block: Diabetes Household Questions

You have indicated that you are a caregiver/significant other/relative/friend of an individual who has diabetes.

**Is this individual with diabetes in your household?**

**Definitions:**

A **household** consists of one or more people who live in the same dwelling and also share meals or living accommodation, and may consist of a single family or some other grouping of people.)

- Yes
- No
- I don't know

---

*Display This Question:*

*If You have indicated that you are a caregiver/significant other/relative/friend of an individual wh... = Yes*

Please describe the individuals in your household who have diabetes in relationship to yourself  
(Check all that apply)

My First Son

My Second Son

My Third Son

My First Daughter

My Second Daughter

My Third Daughter

My Dad

My Mom

My Spouse/Significant other

My Brother

My Sister

My Grandpa

My Grandma

My Aunt

My Uncle

My Friend

Other (you must specify): **My...**

---

Other (you must specify): **My...**

---

Other (you must specify): **My...**

---

End of Block: Diabetes Household Questions

---

Start of Block: LOOP & MERGE block - all questions

**Because you have indicated that there are other members in your household who have diabetes, we will now begin to ask you some questions regarding other members in your household who have diabetes.**

**Please pay attention to the individual being indicated and answer accordingly.**

---

What is  $\${Im://Field/2}$ 's sex?

- Male
- Female
- Other (specify): \_\_\_\_\_
- 

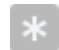

How old is  $\${Im://Field/2}$  **currently** (age in years)?

---

*Display This Question:*

*If If How old is  $\${Im://Field/2}$  currently? Text Response Is Greater Than or Equal to 3  
And How old is  $\${Im://Field/2}$  currently? Text Response Is Less Than or Equal to 21*

Does  $\{\text{Im}://\text{Field}/2\}$  currently attend school or daycare that is outside the home?

- Yes -  $\{\text{Im}://\text{Field}/3\}$  goes to school
- Yes -  $\{\text{Im}://\text{Field}/3\}$  goes to daycare
- No

---

*Display This Question:*

*If Loop current: Does  $\{\text{Im}://\text{Field}/2\}$  currently attend school or daycare that is outside the home? = Yes -  $\{\text{Im}://\text{Field}/3\}$  goes to school*

*Or Loop current: Does  $\{\text{Im}://\text{Field}/2\}$  currently attend school or daycare that is outside the home? =*

If yes, what grade is  $\{\text{Im}://\text{Field}/2\}$  currently in?

▼ Kindergarten ... I don't know

---

What is  $\{\text{Im}://\text{Field}/2\}$ 's race/ethnicity?

- White non-Hispanic
- Black/African American
- Hispanic or Latino
- American Indian/Alaskan Native
- Asian
- Native Hawaiian/Pacific Islander
- Other (specify): \_\_\_\_\_
- I do not wish to answer this question

---

Page Break \_\_\_\_\_

Now we would like to ask you more questions regarding #{Im://Field/2} and #{Im://Field/4} **diabetes.**

How would you describe #{Im://Field/2}'s overall health?

- Excellent
  - Very Good
  - Good
  - Fair
  - Poor
- 

What type of diabetes does #{Im://Field/2} have?

- Type 1 Diabetes
- Type 2 Diabetes
- Other type of Diabetes (specify):  
\_\_\_\_\_

I don't know

---

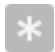

How old was #{Im://Field/2} when #{Im://Field/3} was **diagnosed** with diabetes (please enter in number of years)?

*(Enter 9999 if you do not know)*

\_\_\_\_\_

---

How does  $\{\text{Im}://\text{Field}/2\}$  usually take insulin? (Check all that apply)

- Pump
- Injections/Pens
- $\{\text{Im}://\text{Field}/1\}$  does not take insulin

---

*Display This Question:*

*If How does  $\{\text{Im}://\text{Field}/2\}$  usually take insulin? (Check all that apply) = Pump*

If  $\{\text{Im}://\text{Field}/2\}$  is on an insulin pump, which type is  $\{\text{Im}://\text{Field}/3\}$  currently using?

- Medtronic Minimed
- Animas One Touch Ping
- Insulet Omnipod
- Tandem T: Slim
- Roche Insulin Delivery System
- Asante Snap
- Sooil Dana Diabecare
- Other (specify): \_\_\_\_\_

---

A **continuous glucose monitor** is often referred to as CGM. It consists of a sensor that is inserted underneath the skin and a monitor that shows your glucose values every 5 to 10 minutes.

Which of the following best describes  $\{\text{Im}://\text{Field}/2\}$ 's use of a real-time continuous glucose monitor (CGM) as described above?

- $\{\text{Im}://\text{Field}/3\}$  currently uses a real-time CGM (occasionally or at all the time)
- $\{\text{Im}://\text{Field}/3\}$  used a real-time CGM in the past but completely stopped using it
- $\{\text{Im}://\text{Field}/3\}$  never used a real-time CGM
- I don't know

---

*Display This Question:*

*If A continuous glucose monitor is often referred to as CGM. It consists of a sensor that is inser... =  $\{\text{Im}://\text{Field}/3\}$  currently uses a real-time CGM (occasionally or at all the time)*

Which continuous glucose monitoring (CGM) device does  $\{\text{Im}://\text{Field}/2\}$  **currently** use?

- Enlite
- Paradigm
- Guardian
- Navigator
- Dexcom G4
- Other (specify): \_\_\_\_\_

---

*Display This Question:*

*If A continuous glucose monitor is often referred to as CGM. It consists of a sensor that is inser... =  $\{\text{Im}://\text{Field}/3\}$  currently uses a real-time CGM (occasionally or at all the time)*

How long has  $\{Im://Field/2\}$  been using CGM?

- Less than 6 months
- 6 months to less than 1 year
- 1 year to less than 2 years
- 2 years to less than 3 years
- 3 years to less than 4 years
- 4 years to less than 5 years
- 5 or more years

---

*Display This Question:*

*If A continuous glucose monitor is often referred to as CGM. It consists of a sensor that is inser... =  $\{Im://Field/3\}$  currently uses a real-time CGM (occasionally or at all the time)*

In the past month, about **how many days** has  $\{Im://Field/2\}$  used the CGM?

▼ I don't know ... 31

---

In the past 3 months, about how many times has  $\{Im://Field/2\}$  experienced severe low blood sugar (hypoglycemia) that resulted in passing out, loss of consciousness, or seizure:

**\*\*Note: This survey is anonymous and an individual's reported data will not be shared to anyone outside of the research team\*\***

▼ 0 ... I don't know

---

*Display This Question:*

*If Loop current: A continuous glucose monitor is often referred to as CGM. It consists of a sensor that is inser... !=  $\{Im://Field/3\}$  never used a real-time CGM*



Which of the following best describes  $\{Im://Field/2\}$ 's use of Nightscout?

- $\{Im://Field/3\}$  currently wears Nightscout (occasionally or all the time)
- $\{Im://Field/3\}$  wore Nightscout in the past but  $\{Im://Field/3\}$  has completely stopped using it
- $\{Im://Field/3\}$  never wore Nightscout

*Skip To: Q101 If Which of the following best describes  $\{Im://Field/2\}$ 's use of Nightscout? =  $\{Im://Field/3\}$  never wore Nightscout*

---

Page Break

---

Display This Question:

If Loop current: Which of the following best describes  $\{\text{Im}://\text{Field}/2\}$ 's use of Nightscout? =  $\{\text{Im}://\text{Field}/3\}$  currently wears Nightscout (occasionally or all the time)

If yes, what month and year did  $\{\text{Im}://\text{Field}/2\}$  start using Nightscout?

|                                        | Month                  | Year            |
|----------------------------------------|------------------------|-----------------|
| Please enter the value for month, year | ▼ January ... December | ▼ 2012 ... 2015 |

Display This Question:

If Loop current: Which of the following best describes  $\{\text{Im}://\text{Field}/2\}$ 's use of Nightscout? =  $\{\text{Im}://\text{Field}/3\}$  currently wears Nightscout (occasionally or all the time)

In the past month, about **how many days** has  $\{\text{Im}://\text{Field}/2\}$  used Nightscout?

▼ I don't know ... 31

Display This Question:

If Loop current: Which of the following best describes  $\{\text{Im}://\text{Field}/2\}$ 's use of Nightscout? =  $\{\text{Im}://\text{Field}/3\}$  currently wears Nightscout (occasionally or all the time)

Did  $\{\text{Im}://\text{Field}/2\}$  do any of the following because of Nightscout? (Check all that apply)

- $\{\text{Im}://\text{Field}/3\}$  had not previously used a CGM but started using CGM because of Nightscout
- $\{\text{Im}://\text{Field}/3\}$  had previously used a CGM and restarted using CGM because of Nightscout
- $\{\text{Im}://\text{Field}/3\}$  was using CGM but changed CGM systems because of Nightscout
- None of the above
- Other (specify): \_\_\_\_\_

Display This Question:

If Did  $\{Im://Field/2\}$  do any of the following because of Nightscout? (Check all that apply) =  $\{Im://Field/3\}$  was using CGM but changed CGM systems because of Nightscout

Which CGM device did  $\{Im://Field/2\}$  use **before** starting Nightscout?

- Enlite
- Paradigm
- Guardian
- Navigator
- I don't know

Display This Question:

If Loop current: Which of the following best describes  $\{Im://Field/2\}$ 's use of Nightscout? =  $\{Im://Field/3\}$  currently wears Nightscout (occasionally or all the time)

What activities does  $\{Im://Field/2\}$  use Nightscout for? (Check all that apply)

- Travel
- Nighttime
- Work
- Sporting Events
- School
- Other (specify): \_\_\_\_\_
- I don't know

*Display This Question:*

*If Loop current: Which of the following best describes \${Im://Field/2}'s use of Nightscout? = \${Im://Field/3} currently wears Nightscout (occasionally or all the time)*

Does \${Im://Field/2}'s Endocrinologist know that \${Im://Field/3} use Nightscout?

- Yes
- No
- I don't know

---

*Display This Question:*

*If Does \${Im://Field/2}'s Endocrinologist know that \${Im://Field/3} use Nightscout? = Yes*

Is \${Im://Field/2}'s Endocrinologist supportive of \${Im://Field/4} use of Nightscout?

- Yes
- No
- I don't know

---

Page Break

*Display This Question:*

*If Loop current: Does \${Im://Field/2} currently attend school or daycare that is outside the home? = Yes - \${Im://Field/3} goes to school*

*And Loop current: Which of the following best describes \${Im://Field/2}'s use of Nightscout? = \${Im://Field/3} currently wears Nightscout (occasionally or all the time)*

**We want to ask a handful of questions regarding how \${Im://Field/2}'s use of Nightscout impacts \${Im://Field/4} time at school**

---

*Display This Question:*

*If Loop current: Does \${Im://Field/2} currently attend school or daycare that is outside the home? = Yes - \${Im://Field/3} goes to school*

*And Loop current: Which of the following best describes \${Im://Field/2}'s use of Nightscout? = \${Im://Field/3} currently wears Nightscout (occasionally or all the time)*

Have you included Nightscout as part of a 504 plan with \${Im://Field/2}'s school?

- Yes
  - No
  - Not applicable
  - I don't know
- 

*Display This Question:*

*If Loop current: Does \${Im://Field/2} currently attend school or daycare that is outside the home? = Yes - \${Im://Field/3} goes to school*

*And Loop current: Which of the following best describes \${Im://Field/2}'s use of Nightscout? = \${Im://Field/3} currently wears Nightscout (occasionally or all the time)*

How would you say that your stress level about  $\{Im://Field/2\}$ 's diabetes has changed when  $\{Im://Field/3\}$  started using Nightscout?

- Increased
- Decreased
- Stayed the same
- I don't know

---

*Display This Question:*

*If Loop current: Does  $\{Im://Field/2\}$  currently attend school or daycare that is outside the home? = Yes -  $\{Im://Field/3\}$  goes to school*

*And Loop current: Which of the following best describes  $\{Im://Field/2\}$ 's use of Nightscout? =  $\{Im://Field/3\}$  currently wears Nightscout (occasionally or all the time)*

Did you/are you encountering issues with school about the use of Nightscout?

- Yes
- No
- I don't know

---

*Display This Question:*

*If Did you/are you encountering issues with school about the use of Nightscout? = Yes*

Please describe the issues you are encountering (Check all that apply):

- School does not want  $\{Im://Field/2\}$  to carry a cellphone with him/her during classes
- School does not want  $\{Im://Field/2\}$  to receive notifications from a family member or from the Nightscout system during school
- School does not want the nurse or school personnel to have to monitor or respond to notifications
- Other (specify): \_\_\_\_\_

---

Page Break

*Display This Question:*

*If Loop current: Which of the following best describes \${Im://Field/2}'s use of Nightscout? = \${Im://Field/3} currently wears Nightscout (occasionally or all the time)*

Which version of Nightscout does \${Im://Field/2} currently use?

- Apple Pie (Original/1st release)
- Brownie
- Cookie Monster
- Dreamsicle
- Enchilada
- I don't know

---

Page Break

*Display This Question:*

*If Loop current: Which of the following best describes \${Im://Field/2}'s use of Nightscout? = \${Im://Field/3} currently wears Nightscout (occasionally or all the time)*

We want to learn more about who is viewing Nightscout data and the types of technologies they use to view the data. **Please check the boxes to indicate who is viewing Nightscout data and what types of technology they are using to view \${Im://Field/2} blood sugars.**

*Here is a hypothetical example of how to fill out the table below: if your first son is wearing the Nightscout technology and also using a pebble watch to monitor his Nightscout data AND you (his mom) use a pebble watch to view your data, AND your husband (his dad) uses a pebble watch along with a web-based browser, Care Portal, and push notifications to view your first son's Nightscout data....*

Then, in the example above, the table would be filled out as follows:

**Definitions:** *Pebble watch: Some individuals are using a pebble watch to display the glucose data* *Android Wear: A watch specifically used for Android phones to display glucose data*  
*Mobile Applications: Some individuals are viewing readings on an Android phone or iPhone* *Web-based Browser: The traditional desktop display is used for viewing blood glucose values from a laptop or desktop* *Care Portal: A care portal has a place to enter data about insulin and carbohydrates as well as the display of the blood glucose values* *Push Notifications: Alarms that are sent to the user to let them know about changes (arrows, low and high blood sugars)* *Text Notifications: Alarms that are sent to the user via SMS messaging to let user/caregiver know about changes (arrows, low and high blood sugars)*

**Please check the boxes to indicate who is viewing  $\${Im://Field/2}$  Nightscout data and what types of technology they are using to view  $\${Im://Field/2}$  blood sugars.**





|                                          | Pebble Watch             | Android Wear             | Mobile applications (Android or iPhone) | Web-based browser (for laptop or desktop) | Care Portal              | Push notifications       | Text notifications       |
|------------------------------------------|--------------------------|--------------------------|-----------------------------------------|-------------------------------------------|--------------------------|--------------------------|--------------------------|
| #{Im://Field/1}                          | <input type="checkbox"/> | <input type="checkbox"/> | <input type="checkbox"/>                | <input type="checkbox"/>                  | <input type="checkbox"/> | <input type="checkbox"/> | <input type="checkbox"/> |
| #{Im://Field/4} mom                      | <input type="checkbox"/> | <input type="checkbox"/> | <input type="checkbox"/>                | <input type="checkbox"/>                  | <input type="checkbox"/> | <input type="checkbox"/> | <input type="checkbox"/> |
| #{Im://Field/4} stepmom                  | <input type="checkbox"/> | <input type="checkbox"/> | <input type="checkbox"/>                | <input type="checkbox"/>                  | <input type="checkbox"/> | <input type="checkbox"/> | <input type="checkbox"/> |
| #{Im://Field/4} dad                      | <input type="checkbox"/> | <input type="checkbox"/> | <input type="checkbox"/>                | <input type="checkbox"/>                  | <input type="checkbox"/> | <input type="checkbox"/> | <input type="checkbox"/> |
| #{Im://Field/4} stepdad                  | <input type="checkbox"/> | <input type="checkbox"/> | <input type="checkbox"/>                | <input type="checkbox"/>                  | <input type="checkbox"/> | <input type="checkbox"/> | <input type="checkbox"/> |
| #{Im://Field/4} grandma                  | <input type="checkbox"/> | <input type="checkbox"/> | <input type="checkbox"/>                | <input type="checkbox"/>                  | <input type="checkbox"/> | <input type="checkbox"/> | <input type="checkbox"/> |
| #{Im://Field/4} grandpa                  | <input type="checkbox"/> | <input type="checkbox"/> | <input type="checkbox"/>                | <input type="checkbox"/>                  | <input type="checkbox"/> | <input type="checkbox"/> | <input type="checkbox"/> |
| #{Im://Field/4} brother                  | <input type="checkbox"/> | <input type="checkbox"/> | <input type="checkbox"/>                | <input type="checkbox"/>                  | <input type="checkbox"/> | <input type="checkbox"/> | <input type="checkbox"/> |
| #{Im://Field/4} sister                   | <input type="checkbox"/> | <input type="checkbox"/> | <input type="checkbox"/>                | <input type="checkbox"/>                  | <input type="checkbox"/> | <input type="checkbox"/> | <input type="checkbox"/> |
| #{Im://Field/4} spouse/significant other | <input type="checkbox"/> | <input type="checkbox"/> | <input type="checkbox"/>                | <input type="checkbox"/>                  | <input type="checkbox"/> | <input type="checkbox"/> | <input type="checkbox"/> |
| #{Im://Field/4} close friend             | <input type="checkbox"/> | <input type="checkbox"/> | <input type="checkbox"/>                | <input type="checkbox"/>                  | <input type="checkbox"/> | <input type="checkbox"/> | <input type="checkbox"/> |
| #{Im://Field/4} teacher/coach            | <input type="checkbox"/> | <input type="checkbox"/> | <input type="checkbox"/>                | <input type="checkbox"/>                  | <input type="checkbox"/> | <input type="checkbox"/> | <input type="checkbox"/> |
| #{Im://Field/4} school nurse             | <input type="checkbox"/> | <input type="checkbox"/> | <input type="checkbox"/>                | <input type="checkbox"/>                  | <input type="checkbox"/> | <input type="checkbox"/> | <input type="checkbox"/> |

#{Im://Field/4}  
daycare  
provider

|                          |                          |                          |                          |                          |                          |                          |                          |
|--------------------------|--------------------------|--------------------------|--------------------------|--------------------------|--------------------------|--------------------------|--------------------------|
| <input type="checkbox"/> |
|--------------------------|--------------------------|--------------------------|--------------------------|--------------------------|--------------------------|--------------------------|--------------------------|

Other (specify):

|                          |                          |                          |                          |                          |                          |                          |                          |
|--------------------------|--------------------------|--------------------------|--------------------------|--------------------------|--------------------------|--------------------------|--------------------------|
| <input type="checkbox"/> |
|--------------------------|--------------------------|--------------------------|--------------------------|--------------------------|--------------------------|--------------------------|--------------------------|

Other (specify):

|                          |                          |                          |                          |                          |                          |                          |                          |
|--------------------------|--------------------------|--------------------------|--------------------------|--------------------------|--------------------------|--------------------------|--------------------------|
| <input type="checkbox"/> |
|--------------------------|--------------------------|--------------------------|--------------------------|--------------------------|--------------------------|--------------------------|--------------------------|

---

Page Break

*Display This Question:*

*If Loop current: Which of the following best describes  $\${m://Field/2}$ 's use of Nightscout? =  $\${m://Field/3}$  currently wears Nightscout (occasionally or all the time)*

What features of Nightscout are you using for medical decision making about  $\${m://Field/2}$ 's diabetes? (Check all that apply)

**Definition:** Raw data: for more information click here IOB/COB: for more information click here Predictive data: data that will tell you if glucose levels are going the wrong direction too quickly or if the user may be in trouble soon. Customized alarms: customized alarms set on certain high and low targets Signal Noise: defines how clean the signal being received is; helps to identify compression lows Camping Mode: allows for Nightscout to continue to work when there is no internet access available

- Raw Data
- Insulin on Board (IOB); Carbs on Board (COB)
- Predictive Data
- Customized Alarms
- Signal Noise
- Camping Mode
- Other (specify): \_\_\_\_\_
- I don't know

*Display This Question:*

*If Loop current: What features of Nightscout are you using for medical decision making about  $\${m://Field/2}$ 's dia... = Customized Alarms*

**If you and  $\${m://Field/2}$  use customized alarms, what are  $\${m://Field/4}$  targets?**

Typically the practice in the United States is to measure blood glucose levels using mg/dL (normal range 70-120 mg/dL.) Outside of the U.S. the measure of blood glucose levels is often reported using mmol/L(normal range is 3.9-6.7 mmol/L).

Please answer the following questions by entering a numeric value and select the appropriate units that correspond to the numbers entered.

|             | Blood Glucose Numeric Value | Units              |
|-------------|-----------------------------|--------------------|
|             |                             |                    |
| High target |                             | ▼ mg/dL ... mmol/L |
| Low target  |                             | ▼ mg/dL ... mmol/L |

*Display This Question:*

*If Loop current: Which of the following best describes  $\{Im://Field/2\}$ 's use of Nightscout? =  $\{Im://Field/3\}$  currently wears Nightscout (occasionally or all the time)*

There are many different features of Nightscout that may be used for medical decision making beyond the real-time number. Please indicate which of the labeled features are currently being used by  $\{Im://Field/2\}$  and/others who view Nightscout.

Below are the Desktop, Mobile, and Pebble display. Please note the corresponding features labeled as "A" and "B."

- We use feature "A" on the above image - the small yellow **number**
- We use feature "B" on the above image - the small yellow number **arrow**
- We use **both** feature "A" and feature "B"
- We do **not** use either feature "A" and feature "B"

*Display This Question:*

*If Loop current: Which of the following best describes \${Im://Field/2}'s use of Nightscout? = \${Im://Field/3} currently wears Nightscout (occasionally or all the time)*

Please answer the following questions about \${Im://Field/2}'s diabetes before and after using Nightscout:

|                                                                                                   | Before Nightscout        | After Nightscout         |
|---------------------------------------------------------------------------------------------------|--------------------------|--------------------------|
| How often has diabetes kept \${Im://Field/2} from doing \${Im://Field/4} normal daily activities? | ▼ Never ... I don't know | ▼ Never ... I don't know |
| How often has diabetes kept \${Im://Field/2} from spending time at school/work?                   | ▼ Never ... I don't know | ▼ Never ... I don't know |
| How often has diabetes kept \${Im://Field/2} from spending time with \${Im://Field/4} friends?    | ▼ Never ... I don't know | ▼ Never ... I don't know |

*Display This Question:*

*If Loop current: Which of the following best describes \${Im://Field/2}'s use of Nightscout? = \${Im://Field/3} currently wears Nightscout (occasionally or all the time)*

On average, how many times **per day** did \${Im://Field/2} check \${Im://Field/4} blood sugar with a blood glucose meter before and after using Nightscout?

|  | Before Nightscout | After Nightscout |
|--|-------------------|------------------|
|  |                   |                  |

Times per day

▼ 0 ... I don't know

▼ 0 ... I don't know

*Display This Question:*

*If Loop current: Which of the following best describes  $\${lm://Field/2}$ 's use of Nightscout? =  $\${lm://Field/3}$  currently wears Nightscout (occasionally or all the time)*

On average, how many short-acting insulin boluses **per day** (*bolus doses of insulin for meals, snacks, and high blood sugars*) did  $\${lm://Field/2}$  give before and after using Nightscout?

|                 | Before Nightscout    | After Nightscout     |
|-----------------|----------------------|----------------------|
| Boluses per day | ▼ 0 ... I don't know | ▼ 0 ... I don't know |

*Display This Question:*

*If Loop current: Which of the following best describes  $\${lm://Field/2}$ 's use of Nightscout? =  $\${lm://Field/3}$  currently wears Nightscout (occasionally or all the time)*

On average, how many short-acting insulin boluses **per day** (*bolus doses of insulin for meals, snacks, and high blood sugars*) did  $\${lm://Field/2}$  give in a day **WITHOUT CHECKING BLOOD SUGAR** first with a blood glucose meter before and after using Nightscout?

|                                                                   | Before Nightscout    | After Nightscout     |
|-------------------------------------------------------------------|----------------------|----------------------|
| Boluses per day without checking with a blood glucose meter first | ▼ 0 ... I don't know | ▼ 0 ... I don't know |

*Display This Question:*

*If Loop current: Which of the following best describes  $\${lm://Field/2}$ 's use of Nightscout? =  $\${lm://Field/3}$  currently wears Nightscout (occasionally or all the time)*

On average, how often did your household download  $\${lm://Field/2}$ 's retrospective (past) data from the CGM before and after using Nightscout?

|  | Before Nightscout | After Nightscout |
|--|-------------------|------------------|
|--|-------------------|------------------|

Download frequency of retrospective (past) data from CGM

▼ Never ... I don't know

▼ Never ... I don't know

*Display This Question:*

*If Loop current: Which of the following best describes  $\{Im://Field/2\}$ 's use of Nightscout? =  $\{Im://Field/3\}$  currently wears Nightscout (occasionally or all the time)*

How many instances of **low blood glucose** OR **trending low blood glucose** have you responded to (make a change in insulin dosing, ingest carb, etc.) IN THE PAST MONTH while monitoring  $\{Im://Field/2\}$ 's blood sugars on Nightscout?

*Please enter the # of instances (Enter 9999 if you do not know, enter 0 if you have had no instances)*

*Display This Question:*

*If Loop current: Which of the following best describes  $\{Im://Field/2\}$ 's use of Nightscout? =  $\{Im://Field/3\}$  currently wears Nightscout (occasionally or all the time)*

**Please answer this question if your medical professional reports your HbA1c using % as the unit (typically this is the practice in the United States). Otherwise, please skip to the next question.** Normally in the United States, HbA1c is expressed in a percentage (%) and a HbA1c of 7.0% correlates with an average blood glucose level of 154 mg/dL. **What was  $\{Im://Field/2\}$ 's HbA1c value, including the month and year, shortly before and after starting Nightscout?**

If you don't remember, leave blank.

|                   | Month of HbA1c             | Year of HbA1c   | HbA1c value             |
|-------------------|----------------------------|-----------------|-------------------------|
| Before Nightscout | ▼ January ... I don't know | ▼ 2011 ... 2015 | ▼ 4.0% ... I don't know |
| After Nightscout  | ▼ January ... I don't know | ▼ 2011 ... 2015 | ▼ 4.0% ... I don't know |



---

*Display This Question:*

*If Loop current: Which of the following best describes \${Im://Field/2}'s use of Nightscout? = \${Im://Field/3} currently wears Nightscout (occasionally or all the time)*

**Please answer this question if your medical professional reports your HbA1c using mmol/mol as the unit (typically this is the practice outside of the United States). If you have answered the question above using % as your measure of HbA1c, please skip this question.**

Normally outside the United States, HbA1c is expressed in mmol/mol and a HbA1c of 53.0 mmol/mol correlates with an average blood glucose level of 8.6 mmol/L **What was \${Im://Field/2}'s HbA1c value, including the month and year, shortly before and after starting Nightscout?**

If you don't remember, leave blank.

|                   | Month of HbA1c             | Year of HbA1c   | HbA1c value (mmol/mol)         |
|-------------------|----------------------------|-----------------|--------------------------------|
| Before Nightscout | ▼ January ... I don't know | ▼ 2011 ... 2015 | ▼ 20 mmol/mol ... I don't know |
| After Nightscout  | ▼ January ... I don't know | ▼ 2011 ... 2015 | ▼ 20 mmol/mol ... I don't know |

---

Page Break

*Display This Question:*

*If Loop current: Which of the following best describes \${Im://Field/2}'s use of Nightscout? = \${Im://Field/3} currently wears Nightscout (occasionally or all the time)*

Dexcom recently released its new Dexcom Share software which transfers information from the Dexcom receiver wirelessly to an iPhone so that other individuals can follow the blood sugars remotely.

<http://www.dexcom.com/dexcom-cgm-with-share>

**Has  $\{\text{Im}://\text{Field}/2\}$  switched or does  $\{\text{Im}://\text{Field}/2\}$  plan to switch to the Dexcom Share system?**

- $\{\text{Im}://\text{Field}/1\}$  has switched/plans to switch to Dexcom Share
- $\{\text{Im}://\text{Field}/1\}$  will be staying with Nightscout
- $\{\text{Im}://\text{Field}/1\}$  plans to use both the Dexcom Share and Nightscout
- I don't know

---

*Display This Question:*

*If Loop current: Dexcom recently released its new Dexcom Share software which transfers information from the Dex... =  $\{\text{Im}://\text{Field}/1\}$  has switched/plans to switch to Dexcom Share*

If  $\{\text{Im}://\text{Field}/2\}$  will be switching to Dexcom Share system, what is/are the reason(s) you/ $\{\text{Im}://\text{Field}/3\}$  made this choice? (Check all that apply)

- The Nightscout equipment is too expensive
- The Nightscout equipment has a lot of technical failures
- The Nightscout system requires a physical connection to a cord
- The connection to the Android phone could break the Dexcom receiver
- We use mostly Apple products (iphone, Macbook) in our household
- Other (specify): \_\_\_\_\_

---

*Display This Question:*

*If Loop current: Dexcom recently released its new Dexcom Share software which transfers information from the Dex... =  $\{\text{Im}://\text{Field}/1\}$  will be staying with Nightscout*

If  $\{\text{Im}://\text{Field}/2\}$  will be staying with Nightscout, what is/are the reason(s) you/ $\{\text{Im}://\text{Field}/3\}$  made this choice? (Check all that apply)

- The Dexcom Share equipment is too expensive
- We don't use Apple (iPhone, Macbook) products
- Other (specify): \_\_\_\_\_

---

*Display This Question:*

*If Loop current: Dexcom recently released its new Dexcom Share software which transfers information from the Dex... =  $\{\text{Im}://\text{Field}/1\}$  plans to use both the Dexcom Share and Nightscout*

How does  $\{\text{Im}://\text{Field}/2\}$  plan to use Dexcom Share and Nightscout together?

---

---

---

---

---

---

Page Break

*Display This Question:*

*If Loop current: Which of the following best describes  $\{\text{Im}://\text{Field}/2\}$ 's use of Nightscout? =  $\{\text{Im}://\text{Field}/3\}$  wore Nightscout in the past but  $\{\text{Im}://\text{Field}/3\}$  has completely stopped using it*

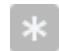

Why did  $\{\text{Im}://\text{Field}/2\}$  stop using Nightscout? (Please drag the reason from the "Items" list in the appropriate order to the box on the right.)

Reasons (please rank top 3)

- 
- \_\_\_\_\_ The Nightscout equipment is too expensive
  - \_\_\_\_\_ The CGM does not provide reliable readings
  - \_\_\_\_\_ Insurance won't cover a continuous glucose monitoring system
  - \_\_\_\_\_ We tried to install the Nightscout system but was unsuccessful

- \_\_\_\_\_ Maintaining the Nightscout system was too technically difficult
- \_\_\_\_\_ Nightscout system was too much work
- \_\_\_\_\_ \${Im://Field/2} did not want to wear Nightscout
- \_\_\_\_\_ \${Im://Field/2} is independent so does not need Nightscout
- \_\_\_\_\_ Other (specify):
- \_\_\_\_\_ I don't know

*Display This Question:*

*If Loop current: Which of the following best describes \${Im://Field/2}'s use of Nightscout? =  
 \${Im://Field/3} never wore Nightscout*

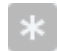

Why did \${Im://Field/2} choose not to use Nightscout? (Please **drag** the reason from the "Items" list in the appropriate order to the box on the right.)

Reasons (please rank top 3)

- \_\_\_\_\_ The Nightscout equipment is too expensive
- \_\_\_\_\_ The CGM does not provide reliable readings
- \_\_\_\_\_ Insurance won't cover a continuous glucose monitoring system
- \_\_\_\_\_ We tried to install the Nightscout system but were unsuccessful
- \_\_\_\_\_ Maintaining the Nightscout system was too technically difficult
- \_\_\_\_\_ Nightscout system was too much work
- \_\_\_\_\_ \${Im://Field/1} did not want to wear Nightscout
- \_\_\_\_\_ \${Im://Field/1} is independent so does not need Nightscout
- \_\_\_\_\_ Other (specify):
- \_\_\_\_\_ I don't know

Page Break

Display This Question:

If Loop current: Which of the following best describes  $\{Im://Field/2\}$ 's use of Nightscout? =  $\{Im://Field/3\}$  never wore Nightscout

Or Loop current: Which of the following best describes  $\{Im://Field/2\}$ 's use of Nightscout? =  $\{Im://Field/3\}$  wore Nightscout in the past but  $\{Im://Field/3\}$  has completely stopped using it

Dexcom recently released its new Dexcom Share software which transfers information from the Dexcom receiver wirelessly to an iPhone so that other individuals can follow the blood sugars remotely. <http://www.dexcom.com/dexcom-cgm-with-share>

**Has  $\{Im://Field/2\}$  started using or does  $\{Im://Field/2\}$  plan to use the Dexcom Share system?**

- Yes
- No
- I don't know

---

Display This Question:

If Loop current: Dexcom recently released its new Dexcom Share software which transfers information from the Dex... = Yes

If  $\{Im://Field/2\}$  plan to use the Dexcom Share system, what are the reasons? (Check all that apply)

- The Dexcom Share is easier to set up than Nightscout
- We use Apple (iPhone, Macbook) products in our household
- Other (specify): \_\_\_\_\_

---

Page Break

How would you describe the insurance plan(s) #{Im://Field/2} has had in the past 12 months?  
(Check all that apply)

- Private Health Insurance (e.g., commercial, fee-for-service, HMO, PPO, POS)
  - Medicare
  - MediGap
  - Medicaid
  - State Children's Health Insurance Program OR Children's Health Insurance Program
  - Military health care (e.g., TRICARE, CHAMPUS, CHAMPVA, VA)
  - Indian Health Service plan
  - Other state sponsored health plan
  - Other government sponsored health coverage plan
  - Single service plan (e.g., dental, vision, prescriptions)
  - No health insurance or health care coverage of any type
  - Do not wish to provide
  - I don't know
-

How much of a problem is the current cost of \${Im://Field/2}'s diabetes supplies and treatment?

- Not a problem at all
- A little problem
- A moderate problem
- A big problem
- An enormous problem

End of Block: LOOP & MERGE block - all questions

---

Start of Block: Nightscout Question (HOUSEHOLD)

*Display This Question:*

*If Which of the following best describes your use of Nightscout? = I currently use Nightscout (occasionally or all the time)*

*Or Loop any: Which of the following best describes \${Im://Field/2}'s use of Nightscout? = \${Im://Field/3} currently wears Nightscout (occasionally or all the time)*

**Because you have indicated that either you or someone in your household uses the Nightscout technology, we want to ask a few questions regarding the Nightscout set up process.**

**Please respond to the following questions regarding Nightscout technology for your**

**household and NOT for the individuals.**

Who PHYSICALLY set up the Nightscout system for your household? (Check all that apply)

- Myself
  - Family member
  - Friend
  - Hired a technology specialist/expert
  - Someone from the CGM in the Cloud Community (please describe how this happened)  
\_\_\_\_\_
  - Other (specify): \_\_\_\_\_
  - I don't know
- 

Did the individual(s) who set up Nightscout for your household have significant technology or programming expertise? (i.e. do they have formal training/education in information technology or computer programming through school or their work?)

- Yes
  - No
  - I don't know
- 

When you initially set up Nightscout, did you ask for help from the CGM in the Cloud Facebook group?

- Yes
  - No
  - I don't know
-



*Display This Question:*

*If When you initially set up Nightscout, did you ask for help from the CGM in the Cloud Facebook group? = Yes*

What type of help did you receive from the CGM in the Cloud Facebook group when setting up the Nightscout technology in your household? (Check all that apply)

- Technical advice about how to setup the Nightscout system
- Advice on where to buy components for the Nightscout system
- Advice about which types of Nightscout technology would work best for you
- Social support encouraging you to use Nightscout technology
- Advice about how to use CGM technology
- Other (specify): \_\_\_\_\_

*Display This Question:*

*If When you initially set up Nightscout, did you ask for help from the CGM in the Cloud Facebook group? = Yes*

How helpful were the volunteers on the 24 hour support through Facebook (CGM in the cloud)?

- Extremely helpful** (they answered all my questions)
- Very helpful** (they answered most of my questions)
- Somewhat helpful** (they pointed me in the right direction but were unable to answer my questions)
- Slightly helpful** (my questions were too difficult for the support volunteers to answer)
- Not at all helpful** (I did not receive the support I was hoping to receive)

Approximately how much did it cost to get the **INITIAL SETUP** for the Nightscout system for your whole household (enter a numeric value for total dollars across **ALL USERS**)?

*(Enter 9999 if you do not know, enter 0 if you spend zero dollars)  
(If you are outside of the United States, please specify the unit of currency)*

---

On a monthly basis, how much does it cost to maintain Nightscout for your household (enter a numeric value for **total dollars**)?

*(Enter 9999 if you do not know, enter 0 if you spend zero dollars)  
(If you are outside of the United States, please specify the unit of currency)*

---

What do you like most about Nightscout?

---

---

---

---

---

What do you like least about Nightscout?

---

---

---

---

---

What aspects of the Nightscout technology need to be fixed or improved?

---

---

---

---

---

---

What new features of Nightscout would you be interested in having added to the current features?

---

---

---

---

---

End of Block: Nightscout Question (HOUSEHOLD)

---

Start of Block: Demographics of survey respondent or MYSELF

Before we finish, we want to collect some demographic information about YOU.

Please fill out the remaining portions of the survey as it relates to **YOU**.

---

What is your sex?

- Male
  - Female
  - Other (specify): \_\_\_\_\_
-

What is your race/ethnicity?

- White non-Hispanic
- Black/African American
- Hispanic or Latino
- American Indian/Alaskan Native
- Asian
- Native Hawaiian/Pacific Islander
- Other (specify): \_\_\_\_\_
- I do not wish to answer this question

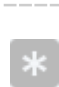

How old are you (in years)?

*If you do not wish to answer, leave blank.*

\_\_\_\_\_

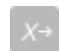

In which country do you reside? *If you do not wish to answer, leave blank.*

▼ United States of America ... Zimbabwe

---

*Display This Question:*

*If List of Countries = United States of America*

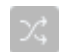

In which state do you currently reside? *If you do not wish to answer, leave blank.*

▼ Alabama ... I do not live in the continental United States

---

What time zone do you live in? *If you do not wish to answer, leave blank.*

- Eastern Time (UTC -5:00/-4:00)
  - Central Time (UTC -6:00/-5:00)
  - Mountain Time (UTC -7:00/-6:00)
  - Pacific Time (UTC -8:00/-7:00)
  - Alaska Time (UTC -9:00/-8:00)
  - Hawaii-Aleutian Time (UTC -10:00/-9:00)
  - Atlantic Time (UTC -4:00/-3:00)
  - Other (specify): \_\_\_\_\_
- 

What is the highest level of education you completed?

- Less than High school diploma/GED
  - High school/GED
  - Associate's or bachelor's degree
  - Master's, professional, doctorate degree
  - I refuse to answer this question
-

What is your current marital status?

- Single, never married
- Married
- Divorced
- Separated
- Widowed
- Living with partner
- I refuse to answer this question

End of Block: Demographics of survey respondent or MYSELF

---

Start of Block: Contact Information

Would you like to be notified about other research studies related to online communities, diabetes and/or Nightscout for which you may be eligible?

- Yes
- No

---

*Display This Question:*

*If Would you like to be notified about other research studies related to online communities, diabete...*  
= Yes

If yes, please provide us with any contact information that you are comfortable sharing with us

- Email
  - Facebook
  - Twitter
-

*Display This Question:*  
*If If yes, please provide us with any contact information that you are comfortable sharing with us = Email*

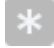

Please provide your email address below

---

*Display This Question:*  
*If If yes, please provide us with any contact information that you are comfortable sharing with us = Facebook*

Please provide us with your Facebook username

---

*Display This Question:*  
*If If yes, please provide us with any contact information that you are comfortable sharing with us = Twitter*

Please provide us with your Twitter handle

---

Please share with us any other Nightscout study ideas you have for future research.

---

---

---

---

---

Is there anything else you want to tell us?

---

---

---

---

---

End of Block: Contact Information

---



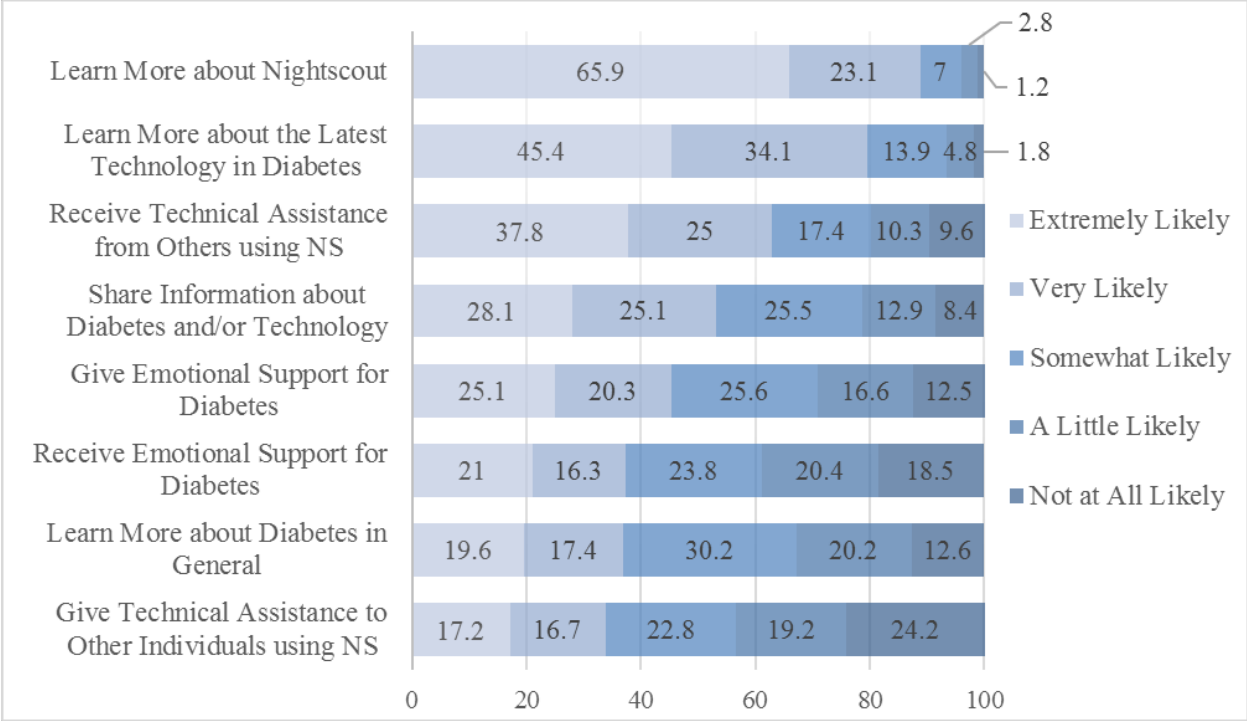

Supplement: Supplemental_File_White_10162017.pdf [file Supplemental_File_White_10162017.pdf]
